# Supplementary material
Source: HighWire-hosted journal article supplement (http://www.cmaj.ca/highwire/filestream/70432/field_highwire_adjunct_files/0/170914-res-1-at.pdf)
Supplement: 170914-res-1-at.pdf [file 170914-res-1-at.pdf]

Appendix 1 (as supplied by the authors). Diagnostic codes for cardiovascular disease main events

| Definition                            | ICD-9                             | ICD-10                                           |
|---------------------------------------|-----------------------------------|--------------------------------------------------|
| Hospitalization (Main Diagnosis only) |                                   |                                                  |
| Acute Myocardial Infarction           | 410<br>410                        | I21<br>I22                                       |
| Stroke                                | 430<br>431<br>434<br>436<br>362.3 | I60<br>I61<br>I63 excluding I63.6<br>I64<br>H341 |
| Death (Vital Statistics)              |                                   |                                                  |
| Ischemic Heart Disease Death          | 410-414, 429.2                    | I20 - I25                                        |
| Stroke Death                          | 430-434, 436-438                  | I60 - I69                                        |

For validation studies of diagnostic codes see. <sup>1 2</sup>

1. Tu JV, Chu A, Donovan LR, et al. The Cardiovascular Health in Ambulatory Care Research Team (CANHEART): using big data to measure and improve cardiovascular health and healthcare services. *Circ Cardiovasc Qual Outcomes* 2015;8(2):204-12. doi: 10.1161/CIRCOUTCOMES.114.001416
2. Kennedy CC, Brien SE, Tu JV. An overview of the methods and data used in the CCORT Canadian Cardiovascular Atlas project. *Can J Cardiol* 2003;19(6):655-63.
